# Supplementary material
Source: PubMed Central journal article supplement (PMC8313032)
Supplement: NIHMS1649143-supplement-Supplemental_Data.pdf [file NIHMS1649143-supplement-Supplemental_Data.pdf]

## Appendix

### Foundations of Health Behavior Change – Course Outline

| <b>Week</b> | <b>Module</b>     | <b>Lecture Topic(s)</b>                                                                                                                                       | <b>Assignments</b>                                                                                                                                  |
|-------------|-------------------|---------------------------------------------------------------------------------------------------------------------------------------------------------------|-----------------------------------------------------------------------------------------------------------------------------------------------------|
| 1           | Introductory      | Social/behavioral causes of illness and mortality; persuading and motivating health behavior change; behavior change strategies                               | Baseline assessment                                                                                                                                 |
| 2           | Nutrition         | Nutrition and chronic disease; promoting healthy eating; nutrition guidelines; environmental restructuring                                                    | Self-assessments for nutrition; selection of nutrition goal and behavior change strategy                                                            |
| 3           | Nutrition         | Applying theory; overview of nutrition interventions (large-scale RCTs)                                                                                       | Summary statement (subjective evaluation of behavior change attempt)                                                                                |
| 4           | Nutrition         | Obesity, “the obesigenic environment”, food marketing and public health policy; weight stigma, health equity, structural determinants of nutrition and health | Evaluation/critique of published public health intervention with nutrition focus                                                                    |
| 5           | Mental Health     | Epidemiology of mental disorders; mental health vs. mental illness; prevention vs. treatment of mental disorders                                              | Self-assessments for mental health; selection of mental wellness goal and behavior change strategy                                                  |
| 6           | Mental Health     | Etiology and treatment of depression; management of mental disorders; positive affect; humor; anxiety; stress and health                                      | Summary statement (subjective evaluation of behavior change attempt)                                                                                |
| 7           | Mental Health     | Social aspects of mental health; LGBTQ mental health                                                                                                          | No assignment (break)                                                                                                                               |
| 8           | Physical activity | The epidemiology and significance of physical activity; measurement; physical activity vs. inactivity                                                         | Selection of physical activity goal and behavior change strategy                                                                                    |
| 9           | Physical activity | Physical activity interventions (frameworks, perspectives, and technologies)                                                                                  | Summary statement (subjective evaluation of behavior change attempt)                                                                                |
| 10          | Physical activity | Individual, social, and built environmental factors contributing to physical activity behaviors                                                               | Evaluation/critique of published public health intervention with physical activity focus                                                            |
| 11          | Social support    | Social/observational learning; social learning theory; social relationships and health                                                                        | Selection of social support goal and behavior change strategy                                                                                       |
| 12          | Social support    | Social support; social capital; photovoice methodology                                                                                                        | Summary statement (subjective evaluation of behavior change attempt); Post assessment                                                               |
| 13          | Conclusion        | Presentation of results and summary: self-care to promote student mental health                                                                               | Summary statement/ evaluation of all behavior change modules; critique and evaluation of effectiveness based on behavior change strategies employed |
